# Supplementary material for: Phase 3 Study of Subcutaneous Versus Intravenous Ravulizumab in Eculizumab-Experienced Adult Patients with PNH: Primary Analysis and 1-Year Follow-Up
Source: Springer Nature journal article supplement (doi:10.1007/s12325-022-02339-3), 2022-10-22
Supplement: MOESM1 [file 23631718]

**SUPPLEMENTARY MATERIAL for “Phase 3 Study of Subcutaneous Versus Intravenous Ravulizumab in Eculizumab-Experienced Adult Patients with PNH: Primary Analysis and 1-Year Follow-Up”**

**Authors:** Mustafa N. Yenerel,<sup>1</sup> Flore Sicre de Fontbrune,<sup>2</sup> Caroline Piatek,<sup>3</sup> Fahri Sahin,<sup>4</sup> Wolfgang Füreder,<sup>5</sup> Stephan Ortiz,<sup>6</sup> Masayo Ogawa,<sup>6</sup> Ayca Ozol-Godfrey,<sup>6</sup> J. Rafael Sierra,<sup>6\*</sup> Jeff Szer<sup>7</sup>

**Affiliations:**

<sup>1</sup>Division of Hematology, Department of Internal Medicine, Istanbul Faculty of Medicine, Istanbul University, Istanbul, Turkey

<sup>2</sup>Hematology and Bone Marrow Transplant Unit, Assistance Publique Hôpitaux des Paris, Saint Louis Hospital, Paris, France

<sup>3</sup>Jane Anne Nohl Division of Hematology, Keck School of Medicine, University of Southern California, Los Angeles, CA, USA

<sup>4</sup>Division of Hematology, Department of Internal Medicine, Ege University, Izmir, Turkey

<sup>5</sup>Division of Hematology and Hemostaseology, Medical University of Vienna, Vienna, Austria

<sup>6</sup>Alexion, AstraZeneca Rare Disease, Boston, MA, USA

<sup>7</sup>Department of Clinical Haematology, Peter MacCallum Cancer Centre and The Royal Melbourne Hospital, Melbourne, VIC, Australia

\*Affiliation at time of study

**Corresponding Author:** Mustafa N. Yenerel (mnyenerel@gmail.com)

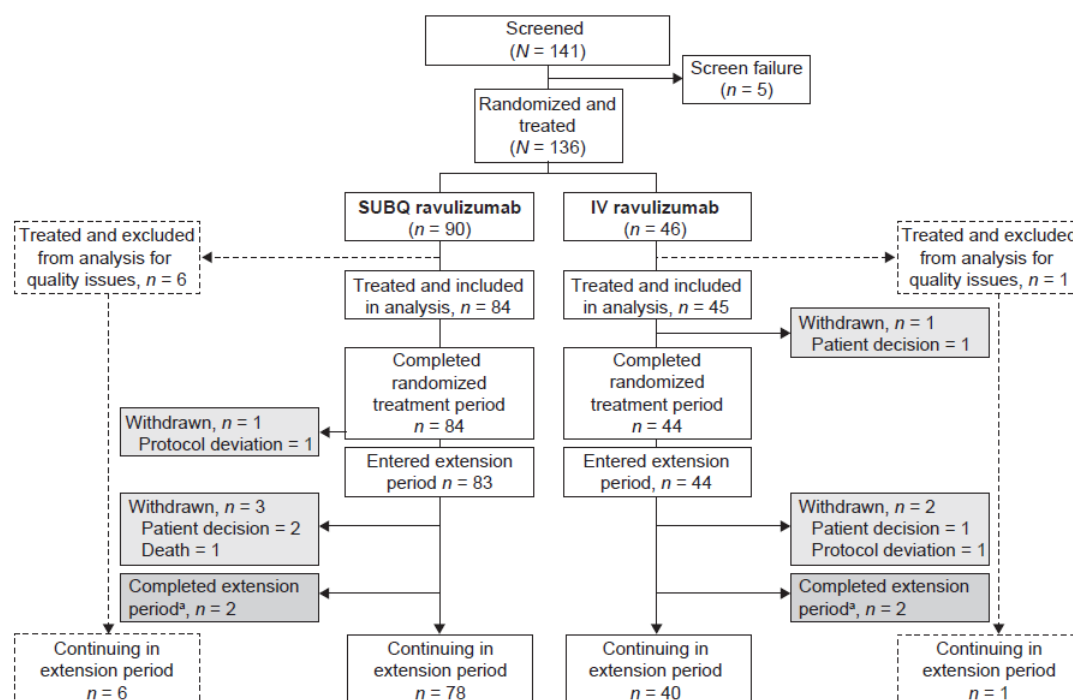

### Supplementary Material Fig. S1 Disposition of patients (all screened patients)

Note: All patients ( $n = 7$ ) from one site were excluded from the primary PK, PD, per protocol, FAS, SUBQ treated FAS, Safety, and SUBQ treated safety analysis sets due to important source documentation deviations and findings related to deficiencies in investigator oversight

<sup>a</sup>Four patients completed the extension period and opted not to continue when the duration of the study was extended

FAS full analysis set, IV intravenous, PD pharmacodynamic, PK pharmacokinetic, SUBQ subcutaneous

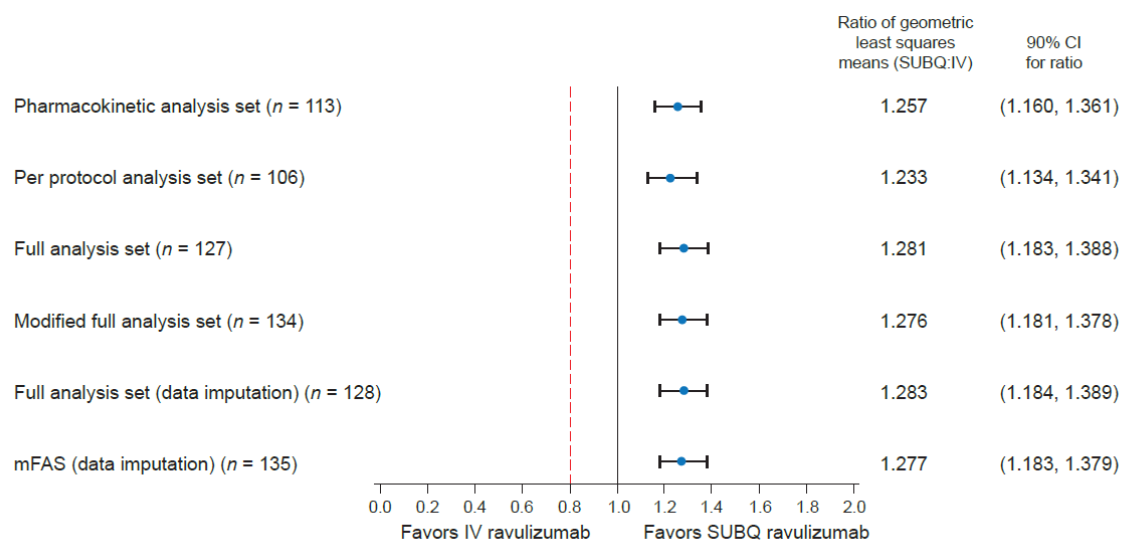

**Supplementary Material Fig. S2** Forest plot of Day 71 serum ravulizumab concentration by population: non-inferiority by analysis set

Note:  $n$  is representative of the number of patients in each analysis set with available data. Each tail is representative of the 90% confidence interval for that analysis set. The null hypothesis that the ratio of geometric means of Day 71 ravulizumab  $C_{\text{trough}}$  between the SUBQ group and the IV group was less than or equal to the non-inferiority margin of 0.8 will fail to be rejected if the lower bound (left tail) crosses the non-inferiority margin represented by the red dashed line.

$C_{\text{trough}}$  trough serum concentration, IV intravenous, mFAS modified full analysis set, SUBQ subcutaneous

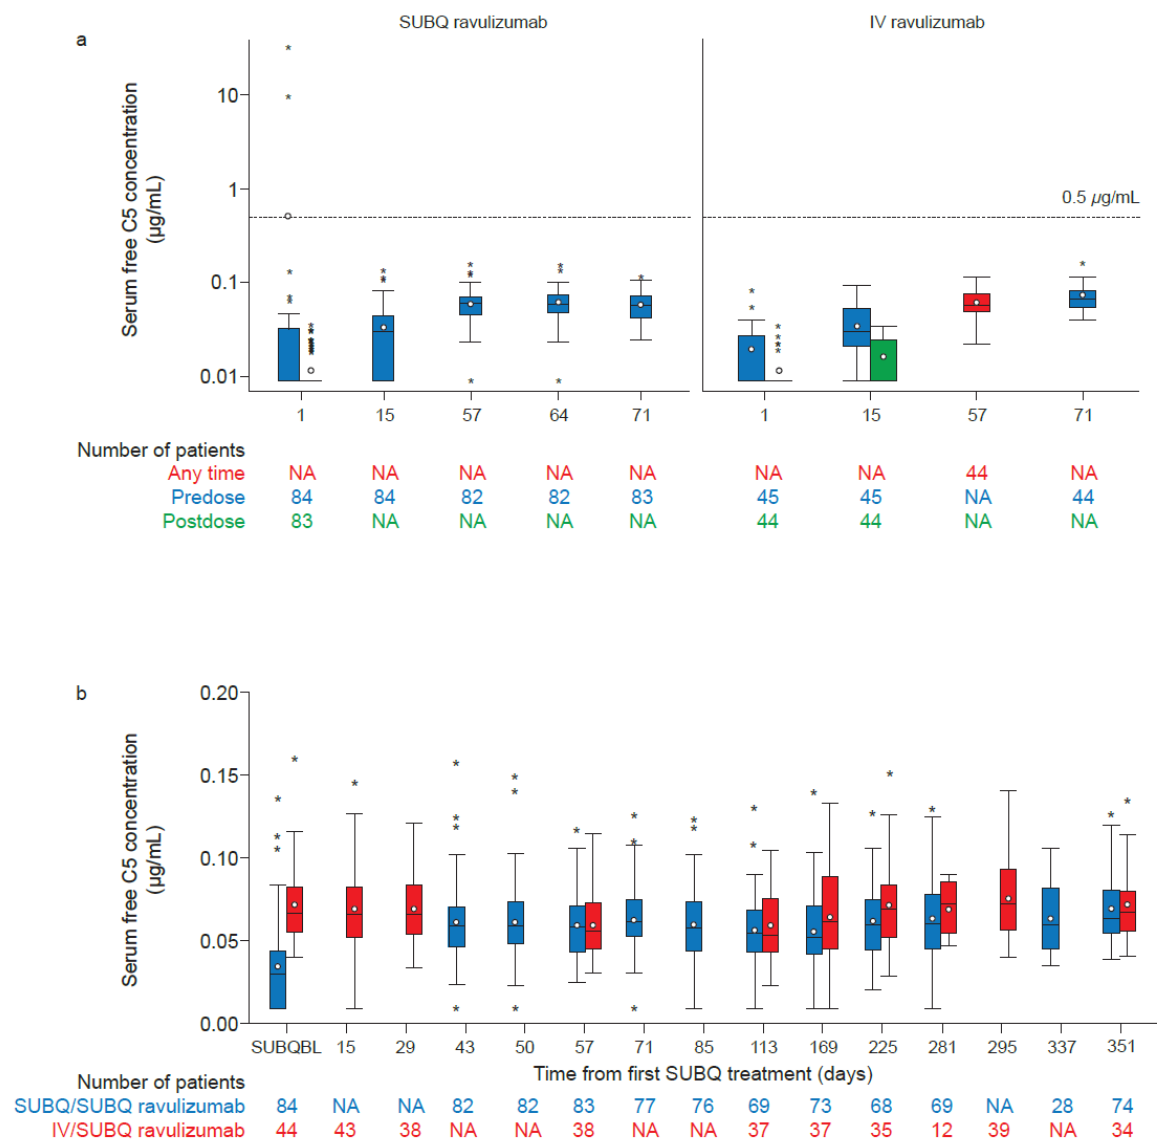

**Supplementary Material Fig. S3** Serum free C5 concentration over time during (a) the randomized treatment period (PD analysis set) and (b) the SUBQ treatment period by treatment group (SUBQ treated full analysis set)

Note: The SUBQ group had samples collected predose at days 1, 15, 57, 64, and 71, and postdose at day 1. The IV group had samples collected predose at days 1, 15, and 71, postdose at days 1 and 15, and any time at day 57. SUBQBL was defined as the last assessment from the central laboratory prior to first dose of SUBQ treatment. *IV* intravenous, *NA* not applicable, *PD* pharmacodynamic, *SUBQ* subcutaneous, *SUBQBL* subcutaneous baseline

**Supplementary Material Table S1** List of ethics committees

| Site No.         | Investigator Name                                  | Name / Address of Ethics Committee                                                                                                                        |
|------------------|----------------------------------------------------|-----------------------------------------------------------------------------------------------------------------------------------------------------------|
| <b>AUSTRALIA</b> |                                                    |                                                                                                                                                           |
| 0080             | Dr. Danny Chih Tsai Hsu                            | South Western Sydney Local Health District<br>Research and Ethics Office,<br>Locked Bag 7103,<br>Liverpool BC NSW 1871                                    |
| 0255             | Prof Jeffrey Szer                                  | South Western Sydney Local Health<br>District, Research and Ethics Office,<br>Locked Bag 7103,<br>Liverpool BC NSW 1871                                   |
| <b>AUSTRIA</b>   |                                                    |                                                                                                                                                           |
| 0529             | Univ. Prof. Dr. med. Wolfgang<br>Füreder           | Ethikkommission Medizinische Universität<br>Wien<br>Borschkegasse 8b/6<br>Vienna, Austria 1090                                                            |
| <b>BELGIUM</b>   |                                                    |                                                                                                                                                           |
| 0126             | Prof. Timothy Devos                                | UZ Leuven Campus Gasthuisberg<br>Ethische Commissie onderzoek<br>Herestraat 49<br>3000 Leuven<br>Belgium                                                  |
| 0535             | Prof. Nicole Straetmans                            | Comite d'Ethique<br>Promenade de l'Alma 51<br>1200 Bruxelles<br>Belgium                                                                                   |
| 0838             | Prof. Koen Theunissen                              | Ethische Toetsingscommissie<br>Jessa Ziekenhuis<br>Stadsomvaart 11<br>3500 Hasselt<br>Belgium                                                             |
| 0996             | Dr Ka Lung Wu                                      | Commissie voor Medische Ethiek ZNA<br>IRB-ZNA/OCMW Antwerpen<br>ZNA Koningin Paola Kinderziekenhuis<br>Lindendreef 1<br>2020 Antwerpen<br>Belgium         |
| <b>BRAZIL</b>    |                                                    |                                                                                                                                                           |
| 0016             | Lucas Oliveira Cantadori                           | Comissao Nacional de Etica em Pesquisa -<br>CONEP<br>SVTV 701, Via W5 Norte<br>Edificio PO 700 - 3 Andar- Asa Norte<br>Brasilia DF<br>Brazil 70719-040    |
| 0020             | Rodrigo do Tocantins Calado de<br>Saloma Rodrigues | Comissao Nacional de Etica em Pesquisa -<br>CONEP<br>SVTV 701, Via W5 Norte<br>Edificio PO 700 - 3 Andar- Asa Norte<br>Brasilia<br>DF Brasil 70719-040    |
| 0306             | Sandra Fatima Menosi Gualandro                     | Comissao Nacional de Etica em Pesquisa -<br>CONEP<br>SVTV 701, Via W5 Norte<br>Edificio PO 700 - 3 Andar- Asa Norte<br>Brasilia<br>DF<br>Brasil 70719-040 |

| Site No.       | Investigator Name               | Name / Address of Ethics Committee                                                                                                                     |
|----------------|---------------------------------|--------------------------------------------------------------------------------------------------------------------------------------------------------|
| 0605           | Viviani de Lourdes Rosa Pessoa  | Comissao Nacional de Etica em Pesquisa - CONEP<br>SVTV 701, Via W5 Norte<br>Edificio PO 700 - 3 Andar- Asa Norte<br>Brasilia<br>DF<br>Brasil 70719-040 |
| 0657           | Celso Arrais Rodrigues da Silva | Comissao Nacional de Etica em Pesquisa - CONEP<br>SVTV 701, Via W5 Norte<br>Edificio PO 700 - 3 Andar- Asa Norte<br>Brasilia<br>DF<br>Brasil 70719-040 |
| 1143           | Adriana Barretto                | Comissao Nacional de Etica em Pesquisa - CONEP<br>SRNTV 701, Via W5 Norte, Edificio PO 700 - 3 andar Asa Norte, Brasilia/DF, Brasil<br>70719-049       |
| <b>CANADA</b>  |                                 |                                                                                                                                                        |
| 0158           | Christopher Patriquin, MD       | University Health Network Research Ethics Board<br>700 University Ave. 10th Floor, Room 1056<br>Toronto, Ontario M5G 1Z5 Canada                        |
| <b>FINLAND</b> |                                 |                                                                                                                                                        |
| 0647           | Anna-Elina Lehtinen             | Helsingin ja Uudenmaan sairaanhoitopiiri<br>Eettinen toimikunta II<br>Biodemicum 2 C<br>Tukholmankatu 2 C Helsinki<br>Finland 000290                   |
| <b>FRANCE</b>  |                                 |                                                                                                                                                        |
| 0117           | Michael Loschi, MD <sup>a</sup> | Comite de Protection des Personnes OUEST 2<br>Maison de la Recherche Clinique - CHU d'Angers - 4 rue Larrey - 49933 Angers<br>Cedex 9 - France         |
| 0125           | Pr Jean-Francois Viallard       | Comite de Protection des Personnes OUEST 2<br>Maison de la Recherche Clinique - CHU d'Angers - 4 rue Larrey - 49933 Angers<br>Cedex 9 - France         |
| 0260           | Pr Emmanuel Gyan                | Comite de Protection des Personnes OUEST 2<br>Maison de la Recherche Clinique - CHU d'Angers - 4 rue Larrey - 49933 Angers<br>Cedex 9 - France         |
| 0263           | Prof. Regis Peffault de Latour  | Comite de Protection des Personnes OUEST 2<br>Maison de la Recherche Clinique - CHU d'Angers - 4 rue Larrey - 49933 Angers<br>Cedex 9 - France         |

| Site No. | Investigator Name              | Name / Address of Ethics Committee                                                                                                                   |
|----------|--------------------------------|------------------------------------------------------------------------------------------------------------------------------------------------------|
| 0336     | Louis Terriou, MD              | Comite de Protection des Personnes OUEST<br>2<br>Maison de la Recherche Clinique - CHU<br>d'Angers - 4 rue Larrey - 49933 Angers<br>Cedex 9 - France |
| 0337     | Dr Bruno Lioure                | Comite de Protection des Personnes OUEST<br>2<br>Maison de la Recherche Clinique - CHU<br>d'Angers - 4 rue Larrey - 49933 Angers<br>Cedex 9 - France |
| 0466     | Dr Fiorenza Barraco            | Comite de Protection des Personnes OUEST<br>2<br>Maison de la Recherche Clinique - CHU<br>d'Angers - 4 rue Larrey - 49933 Angers<br>Cedex 9 - France |
| 0467     | Dr Sophie De Guibert           | Comite de Protection des Personnes OUEST<br>2<br>Maison de la Recherche Clinique - CHU<br>d'Angers - 4 rue Larrey - 49933 Angers<br>Cedex 9 - France |
| 0544     | Dr Jose Miguel Torregrosa Diaz | Comite de Protection des Personnes OUEST<br>2<br>Maison de la Recherche Clinique - CHU<br>d'Angers - 4 rue Larrey - 49933 Angers<br>Cedex 9 - France |
| 0637     | Dr Nicolas Blin                | Comite de Protection des Personnes OUEST<br>2<br>Maison de la Recherche Clinique - CHU<br>d'Angers - 4 rue Larrey - 49933 Angers<br>Cedex 9 - France |
| 0652     | Dr. Jean-Richard Eveillard     | Comite de Protection des Personnes OUEST<br>2<br>Maison de la Recherche Clinique - CHU<br>d'Angers - 4 rue Larrey - 49933 Angers<br>Cedex 9 - France |
| 0688     | Delphine Lebon, MD             | Comite de Protection des Personnes OUEST<br>2<br>Maison de la Recherche Clinique - CHU<br>d'Angers - 4 rue Larrey - 49933 Angers<br>Cedex 9 - France |
| 0689     | Robert Navarro                 | Comite de Protection des Personnes OUEST<br>2<br>Maison de la Recherche Clinique - CHU<br>d'Angers - 4 rue Larrey - 49933 Angers<br>Cedex 9 - France |

| Site No.           | Investigator Name                    | Name / Address of Ethics Committee                                                                                                                                                                                                                                                                           |
|--------------------|--------------------------------------|--------------------------------------------------------------------------------------------------------------------------------------------------------------------------------------------------------------------------------------------------------------------------------------------------------------|
| <b>ITALY</b>       |                                      |                                                                                                                                                                                                                                                                                                              |
| 0115               | Prof. Simona Sica                    | Comitato Etico<br>Fondazione Policlinico Universitario A. Gemelli<br>Universita Cattolica del S. Cuore<br>Largo Agostino Gemelli, 8 - 00168 Roma                                                                                                                                                             |
| 0523               | Dr. Wilma Barcellini                 | Comitato Etico Milano Area B<br>Fondazione IRCCS Ca' Granda<br>Ospedale Maggiore Policlinico<br>Via F. Sforza, 28 - 20122 Milano, Italy                                                                                                                                                                      |
| 0708               | Prof. Maurizio Martelli <sup>b</sup> | Comitato Etico "Sapienza"<br>Policlinico Umberto I<br>Viale del Policlinico, 155 - 00161 Roma, Italy                                                                                                                                                                                                         |
| 0762               | Prof. Francesco Di Raimondo          | Comitato Etico di Catania 1<br>Azienda Ospedaliero - Universitaria<br>"Policlinico - Vittorio Emanuele"<br>via S. Sofia, 78 - 95123 Catania, Italy                                                                                                                                                           |
| <b>NETHERLANDS</b> |                                      |                                                                                                                                                                                                                                                                                                              |
| 0172               | Marjolein W.M. van der Poel          | METC azM/UM<br>Maastricht University Medical Centre (MUMC)<br>P. Debyelaan 25<br>Maastricht<br>Limburg<br>Netherlands<br>6229 HX                                                                                                                                                                             |
| <b>RUSSIA</b>      |                                      |                                                                                                                                                                                                                                                                                                              |
| 0427               | Alexander D. Kulagin, MD             | Local Ethics Committee of the Federal State Budgetary Educational Institution of Higher Education<br>"First Saint Petersburg State Medical University name after Academician P. I. Pavlov" of Ministry of Healthcare of the Russian Federation<br>12, Rentgen street<br>Saint Petersburg<br>Russia<br>197022 |
| 0428               | Elena Lukina, MD, Prof               | Local Ethics Committee of the Federal State Budgetary Institution "National Medical Research Center of Hematology" of the Ministry of Healthcare of the Russian Federation<br>4, Novy Zykovsky pr.<br>Moscow<br>Russia<br>125167                                                                             |

| Site No.     | Investigator Name                                      | Name / Address of Ethics Committee                                                                                                                                                                   |
|--------------|--------------------------------------------------------|------------------------------------------------------------------------------------------------------------------------------------------------------------------------------------------------------|
| 0660         | Vadim V. Ptushkin, MD, PhD, Dr. of Med. Science, Prof. | Moscow City Independent Ethics Committee (MCEC)<br>12, bld. 2, Minskaya str.<br>Moscow<br>Russia<br>121096                                                                                           |
| 0905         | Tatiana S. Konstantinova, MD, PhD                      | Local Ethics Committee of the State Budgetary Healthcare Institution of Sverdlovsk region "Sverdlovsk Regional Clinical Hospital #1"<br>185, Volgogradskaya Str.<br>Ekaterinburg<br>Russia<br>620102 |
| <b>SPAIN</b> |                                                        |                                                                                                                                                                                                      |
| 0055         | Fernando Ataulfo Gonzalez Fernandez                    | CEIm Hospital Universitario Puerta de Hierro de Majadahonda<br>Hospital Universitario Puerta de Hierro Majadahonda<br>C\ Joaquin Rodrigo, 2<br>Majadahonda; Madrid<br>Spain<br>28222                 |
| 0279         | Ines Hernandez Rodriguez                               | CEIm Hospital Universitario Puerta de Hierro de Majadahonda<br>Hospital Universitario Puerta de Hierro Majadahonda<br>C\ Joaquin Rodrigo, 2<br>Majadahonda; Madrid<br>Spain<br>28222                 |
| 0282         | Anna Gaya Valls                                        | CEIm Hospital Universitario Puerta de Hierro de Majadahonda<br>Hospital Universitario Puerta de Hierro Majadahonda<br>C\ Joaquin Rodrigo, 2 Majadahonda; Madrid Spain<br>28222                       |
| 0292         | Ramiro Nunez Vazquez                                   | CEIm Hospital Universitario Puerta de Hierro de Majadahonda<br>Hospital Universitario Puerta de Hierro Majadahonda<br>C\ Joaquin Rodrigo, 2 Majadahonda; Madrid Spain<br>28222                       |
| 0429         | Emilio Ojeda Gutierrez                                 | CEIm Hospital Universitario Puerta de Hierro de Majadahonda<br>Hospital Universitario Puerta de Hierro Majadahonda<br>C\ Joaquin Rodrigo, 2 Majadahonda; Madrid Spain<br>28222                       |

| Site No.      | Investigator Name                | Name / Address of Ethics Committee                                                                                                                                                                                                           |
|---------------|----------------------------------|----------------------------------------------------------------------------------------------------------------------------------------------------------------------------------------------------------------------------------------------|
| 1004          | Maria Araiz Ramirez <sup>c</sup> | CEIm Hospital Universitario Puerta de Hierro de Majadahonda<br>Hospital Universitario Puerta de Hierro Majadahonda<br>C\ Joaquin Rodrigo, 2 Majadahonda;<br>Madrid Spain<br>28222                                                            |
| 1005          | Maria Angelina Lemes Castellano  | CEIm Hospital Universitario Puerta de Hierro de Majadahonda<br>Hospital Universitario Puerta de Hierro Majadahonda<br>C\ Joaquin Rodrigo, 2 Majadahonda;<br>Madrid Spain<br>28222                                                            |
| <b>SWEDEN</b> |                                  |                                                                                                                                                                                                                                              |
| 0556          | Martin Hoeglund                  | Etikprovningsmyndigheten<br>Box 2110<br>750 02 Uppsala<br>Sweden                                                                                                                                                                             |
| <b>TURKEY</b> |                                  |                                                                                                                                                                                                                                              |
| 0075          | Mustafa Nuri Yenerel             | Istanbul Medical Faculty<br>Clinical Trials Ethics<br>Committee<br>Istanbul Tip Fakueltesi<br>Klinik Arastirmalar Etik<br>Kurulu,<br>I.U. Istanbul Tip Fakueltesi<br>Hulusi Behcet<br>Kuetuephanesi Kat: 3<br>Istanbul Fatih Turkey<br>34093 |
| 0142          | Professor Muhlis Cem Ar          | Istanbul Medical Faculty<br>Clinical Trials Ethics<br>Committee<br>Istanbul Tip Fakueltesi<br>Klinik Arastirmalar Etik<br>Kurulu<br>I.U. Istanbul Tip Fakueltesi<br>Hulusi Behcet<br>Kuetuephanesi Kat:3<br>Istanbul Fatih Turkey<br>34093   |
| 0192          | Professor Ayse Tuelin Tuglular   | Istanbul Medical Faculty<br>Clinical Trials Ethics<br>Committee<br>Istanbul Tip Fakueltesi<br>Klinik Arastirmalar Etik<br>Kurulu<br>I.U. Istanbul Tip Fakueltesi<br>Hulusi Behcet<br>Kuetuephanesi Kat:3<br>Istanbul Fatih Turkey<br>34093   |

| Site No.   | Investigator Name       | Name / Address of Ethics Committee                                                                                                                                                                                                         |
|------------|-------------------------|--------------------------------------------------------------------------------------------------------------------------------------------------------------------------------------------------------------------------------------------|
| 0459       | Professor Fahri Sahin   | Istanbul Medical Faculty<br>Clinical Trials Ethics<br>Committee<br>Istanbul Tip Fakueltesi<br>Klinik Arastirmalar Etik<br>Kurulu<br>I.U. Istanbul Tip Fakueltesi<br>Hulusi Behcet<br>Kuetuephanesi Kat:3<br>Istanbul Fatih Turkey<br>34093 |
| 0461       | Professor Birol Guevenc | Istanbul Medical Faculty<br>Clinical Trials Ethics<br>Committee<br>Istanbul Tip Fakueltesi<br>Klinik Arastirmalar Etik<br>Kurulu<br>I.U. Istanbul Tip Fakueltesi<br>Hulusi Behcet<br>Kuetuephanesi Kat:3<br>Istanbul Fatih Turkey<br>34093 |
| <b>USA</b> |                         |                                                                                                                                                                                                                                            |
| 0560       | Caroline Piatek, MD     | University of Southern<br>California (USC)<br>Institutional Review Board<br>1640 Marengo Street<br>Suite 700<br>Los Angeles, CA USA<br>90033                                                                                               |

<sup>a</sup>Previous PI: Thomas Cluzeau, MD, PhD

<sup>b</sup>Previous PI: Prof. Roberto Foa, MD

<sup>c</sup>Previous PI: Anunciacion Urquia Plazaola
